# Supplementary material for: Dietary Habits and Lifestyle, Including Cardiovascular Risk among Vegetarians and Omnivores during the COVID-19 Pandemic in the Polish Population
Source: MDPI journal article supplement (doi:10.3390/nu15020442), 2023-01-14
Supplement: s1 [file s1]

Questionnaire S2: NUTRITION HABITS OF PEOPLE ON A TRADITIONAL / MIXED DIET DURING THE PANDEMIC

1. Place of residence\*

2. Date of birth\*

3. Sex\*

- female
- male
- prefer not to say

4. Height [ft]\*

5. Weight [lbs]\*

6. Place of residence\*

- countryside
- city with up to 50,000 residents
- city with up to 100,000 residents
- city with up to 250,000 residents
- city with over 250,000 residents

7. Current employment status\*

- I'm a student
- I'm a student with a part time job
- I'm a student with a full time job
- I'm an office worker (ca.8h)
- I'm a manual worker (ca.8h)
- I'm not currently employed
- other:

8. What's your education?

- primary
- vocational
- secondary
- attending university
- higher in medical studies
- higher in biological studies
- higher in economical studies
- higher in mechanical studies
- other:

9. \*only answer if you're a university student\* What are you studying?

- Medical studies
- Biological studies
- Economical Studies
- Technical Studies
- other:

### Questions about cardiovascular risk factors

1. During your last blood pressure measurement, your blood pressure value was as follows:

- > 140/80
- 140/80 - 120/60
- < 120/60
- I don't know
- do not measure

2. How often do you eat meals prepared in deep fat?

- never/ almost never
- once a month or less often
- several times a month
- several times a week
- everyday
- several times a day

3. How often do you eat meals that include the addition of a large amount of fat (fast-food, pizza, ready meals)?

- never/ almost never
- once a month or less often
- several times a month
- several times a week
- everyday
- several times a day

4 How often do you add butter or cream (\*or vegetable substitutes for these products) to your dishes?

- never/ almost never
- once a month or less often
- several times a month
- several times a week
- everyday
- several times a day

5 How often do you add vegetable oil (rapeseed oil, sunflower oil, olive oil, flaxseed oil, etc.) to your dishes?

- never/ almost never
- once a month or less often
- several times a month
- several times a week
- everyday
- several times a day

6. Please estimate how often you add to your dishes - 1 tablespoon of fat (oil / oil / butter / margarine / coconut oil / peanut butter):

- never/ almost never
- several times a month

- several times a week
- I consume < 1 tbsp per day
- I consume 1-2 tablespoons a day
- I consume 3-4 tablespoons a day
- I consume > 5 tbsp per day

7. do you smoke cigarettes?

- yes, occasionally
- yes, regularly
- no

8. do you consume alcohol?

- no
- once in a month or less
- several times a month
- approx. 3-5 times a week
- approx. 1-2 times a week
- everyday
- I refuse to answer

9. How do you determine your level of physical activity?

| Level of physical activity | Number of minutes of moderate intensity exercise (e.g., dynamic walking or cycling, aerobics) performed |
|----------------------------|---------------------------------------------------------------------------------------------------------|
| Low                        | <150 min/week                                                                                           |
| Medium                     | 150–300 min weekly                                                                                      |
| High                       | >300 min/week                                                                                           |

- low activity
- medium activity
- high activity

10. have/are there any cardiovascular diseases among first-degree relatives (parents, siblings, children), i.e. heart disease, heart attack, stroke, hypertension, thrombosis ?

- yes
- no
- don't know

11. did/does your first-degree relatives (parents, siblings, children) have abnormal lipid profile values (total cholesterol, triglycerides, HDL, LDL fraction cholesterol) ?

- yes
- no
- don't know

12. Did/does any first-degree relatives (parents, siblings, children) have abnormal fasting glucose values, or relatives have diabetes/insulin resistance?

- yes
- no

- don't know

13. Have you been diagnosed with cardiovascular diseases, i.e. heart disease, heart attack, stroke, hypertension, thrombosis ?

- yes (if YES, please write what irregularity the answer refers to - below in "other")
- no
- don't know
- other:.....

14. do you have abnormal lipid profile values (total cholesterol, triglycerides, HDL cholesterol, LDL cholesterol) ?

- yes
- no
- I don't know, I haven't had such research

15. if you answered yes to the previous question, please indicate which parameters are incorrect?  
(\*Multiple answers can be marked)

- total cholesterol
- HDL cholesterol
- LDL cholesterol
- triglycerides
- don't remember

16. have you been diagnosed with abnormal fasting glucose values / diabetes / insulin resistance?

- yes (if YES, please write what irregularity the answer refers to - below in "other")
- no
- don't know
- other:.....

### Changes caused by an epidemiological situation

1. Has your lifestyle changed due to the epidemiological situation?\*

- yes
- no

2. Did the information on the number of cases and deaths from COVID have an impact on your well-being?\*

- yes, negative
- no

3. What kind of feelings did the epidemic evoke? \*you may choose more than one answer\*

- fear, horror
- anger
- relief from having to isolate and maintain social distance

- hopelessness, helplessness
- calm

4. Did the information on Covid-19 have any impact on the number of meals consumed during the day?\*

- yes, I was eating less
- yes, I was eating more
- no impact
- I have no opinion

5. Did your eating habits change during the pandemic? \*You may choose more than one answer\*

- yes, I was eating more healthy food, e.g. nuts, vegetables, fruit
- yes, I was eating less healthy food, e.g. nuts, vegetables, fruit
- yes, I was eating more sweets
- yes, I was eating less sweets
- yes, I was eating more savoury snacks
- yes, I was eating less savoury snacks
- yes, I was eating more junk food, e.g. ready meals, fast food
- yes, I was eating less junk food, e.g. ready meals, fast food
- no change

6. How did your activity routine change during the pandemic?\*

- I exercised RARELY and the Covid-19 situation did not have any impact
- I exercised RARELY and the Covid-19 situation made me work out MORE
- I exercised RARELY and the Covid-19 situation made me work out even LESS
- I exercised SOMETIMES and the Covid-19 situation did not have any impact
- I exercised SOMETIMES and the Covid-19 situation made me work out MORE
- I exercised SOMETIMES and the Covid-19 situation made me work out LESS
- I exercised FREQUENTLY and the Covid-19 situation did not have any impact
- I exercised FREQUENTLY and the Covid-19 situation made me work out MORE
- I exercised FREQUENTLY and the Covid-19 situation made me work out LESS

7. Did your sleep pattern change during the pandemic?\*

- yes, I slept longer
- yes, I slept shorter
- yes, I go to bed at more regular times
- yes, I go to bed at less regular Times
- I get up earlier
- I get up later
- I go to bed earlier
- I go to bed later
- no

8. How many hours of sleep did you get before the pandemic?\*

- <5-6h
- 7-8h
- >8h

9. How many hours of sleep do you get during the pandemic?\*

- <5-6h
- 7-8h
- >8h

10. Do you work more because of the Covid-19 situation?\*

- yes
- no

11. What is the type of work you do during the pandemic period?

- I only work remotely
- I work hybrid (some days remote/some days on-site at work)
- I'm on the job every day (remote)
- not working during the pandemic period

12. Did your weight change during the pandemic?\*

- I lost weight
- I gained weight
- no change
- I did not check

13. Did your eating habits change during the pandemic? \*

- yes
- no (please, if you chose this then skip the next part and send the form)

#### Diet changes during the pandemic

1. During the pandemic, you consume every day:

- more food
- less food
- same amount of food as before the pandemic

2. Has the number of meals consumed during the day changed?

- yes
- no \* (please go to question no. 5)
- don't know

3. How many meals did you have before the pandemic?

- 1-2
- 3
- 4
- 5
- 6
- >6

4. How many meals per day did you have during the pandemic?

- 1-2
- 3
- 4
- 5
- 6
- >6

5. Has the regularity of eating meals changed?

- yes, during the pandemic I started eating more regularly
- yes, during the pandemic I started eating less regularly
- no

6. Did you start eating more snacks during the pandemic?

- definitely yes
- I consume more snacks
- I consume less snacks
- I'm consuming the same amount of snacks
- I did not consume snacks before and this not changed

7. Has food preparation changed during the pandemic?

- yes, I started to pay more attention to preparing a wholesome meal
- I have always prepared my own meals and nothing has changed in this regard
- nothing has changed, I consume ready/purchased meals as I did before the pandemic
- I started to consume more ready meals

8. During the pandemic, did you have ready meals more often?

- definitely yes
- yes
- no

9. Did you consume more vegetables during the pandemic?

- yes, I reach for them very often (compared to before the pandemic, I have increased my consumption by >3 pieces / day)
- yes, by about 1-2 pieces /day (compared to before the pandemic)
- no, vegetable consumption has not changed
- I don't like vegetables, I avoid eating them (also before the pandemic)

Please estimate the number of servings (vegetables) consumed during the day (assuming one serving is a glass of raw vegetables or half a glass of vegetable juice)

- <1 serving
- 1-2 servings
- <3 servings
- 4-6 servings
- 6-8 servings
- >8 servings
- don't know

10. During the pandemic, did you consume fruit more often?

- yes, I reach for them very often (compared to before the pandemic, I have increased my consumption by >3 pieces / day)
- yes, by about 1-2 pieces /day (compared to before the pandemic)
- no, fruits consumption has not changed
- I don't like vegetables, I avoid eating them (also before the pandemic)

Please estimate the number of servings (fruit) consumed during the day (assuming that one serving is one average piece of fruit or half a glass of fruit juice)

- <1 serving
- 1-2 servings
- <3 servings
- 4-6 servings
- 6-8 servings
- >8 servings
- don't know

11. During the pandemic, did you eat more legumes (chickpeas, lentils, beans, peas)?

- yes, I reach for them very often (compared to before the pandemic, I have increased my consumption by 3 times / day)
- yes, but I reach for them occasionally (1 time a day)
- no, consumption of legumes has not changed
- I don't like legumes, I avoid eating them (also before the pandemic)

Please estimate the number of servings (legumes) consumed during the day (assuming that one serving is half a cup of cooked legumes)

- <1 serving
- 1-2 servings
- <3 servings
- 4-6 servings
- 6-8 servings
- >8 servings
- don't know

12. During the pandemic, did you eat whole grains more often?

- yes, I reach for them very often (at least 5 times a day)
- yes, but I reach for them occasionally (<3 times a day)
- no, consumption of whole grain cereal products has not changed
- I don't like whole grain cereal products, I avoid eating them (including before the pandemic)

Please estimate the number of servings (whole grains) consumed during the day (assuming that one serving is one slice of bread)

- <1 serving
- 1-2 servings
- <3 servings
- 4-6 servings
- 6-8 servings
- >8 servings



- don't know

13. During the pandemic, did you eat dairy products more often (milk, buttermilk, yoghurt)?

- yes, I reach for them very often (at least 5 times a day)
- yes, but I reach for them occasionally (<3 times a day)
- no, consumption of dairy products has not changed
- I don't like dairy products, I avoid eating them (including before the pandemic)

Please estimate the number of servings (dairy products) consumed during the day (assuming that one serving is a glass of milk)<1 serving

- 1-2 servings
- <3 servings
- 4-6 servings
- 6-8 servings
- >8 servings
- don't know

14. During the pandemic, did you eat nuts, and seeds more often?

- yes, I reach for them very often (at least 5 times a day)
- yes, but I reach for them occasionally (<3 times a day)
- no, consumption of nuts and seeds has not changed
- I don't like this products, I avoid eating them (including before the pandemic)

Please estimate the number of servings (nuts, seeds) consumed during the day (assuming that one serving is 1/4 cup of walnuts)

- <1 serving
- 1-2 servings
- <3 servings
- 4-6 servings
- 6-8 servings
- >8 servings
- don't know

15. During the pandemic, did you eat meat products more often?

- yes, I reach for them very often (at least 5 times a day)
- yes, but I reach for them occasionally (<3 times a day)
- no, consumption of meat has not changed

Please estimate the number of servings (meat products) consumed during the day (assuming that one serving is 1 slice of ham or half a sausage or half a chicken fillet)

- <1 serving
- 1-2 servings
- <3 servings
- 4-6 servings
- 6-8 servings
- >8 servings
- don't know

16. Did you drink alcohol more often during the pandemic?

- yes, I reach for alcohol very often
- yes, but I reach for alcohol occasionally
- I consume the same amount of alcohol as before the pandemic
- I do not consume alcohol at all

17. Did you increase the number of cigarettes smoked during the pandemic?

- yes
- I started smoking during the pandemic
- I smoke the same amount during the pandemic
- I did not smoke before the pandemic and that did not change

18. I believe that the changes in my diet are:

- positive
- negative
- I have no opinion

19. What influenced you to change your diet (you can give more than 1 answer):

- stress, fear - negative emotions
- more time to prepare meals
- more time to consume snacks
- in this particular period, I wanted to take better care of my health
- other:
